# Supplementary material for: Targeted proteomics reveals promising biomarkers of disease activity and organ involvement in antineutrophil cytoplasmic antibody-associated vasculitis
Source: Springer Nature journal article supplement (doi:10.1186/s13075-017-1429-3), 2017-09-29
Supplement: MOESM1 [file 15095040]

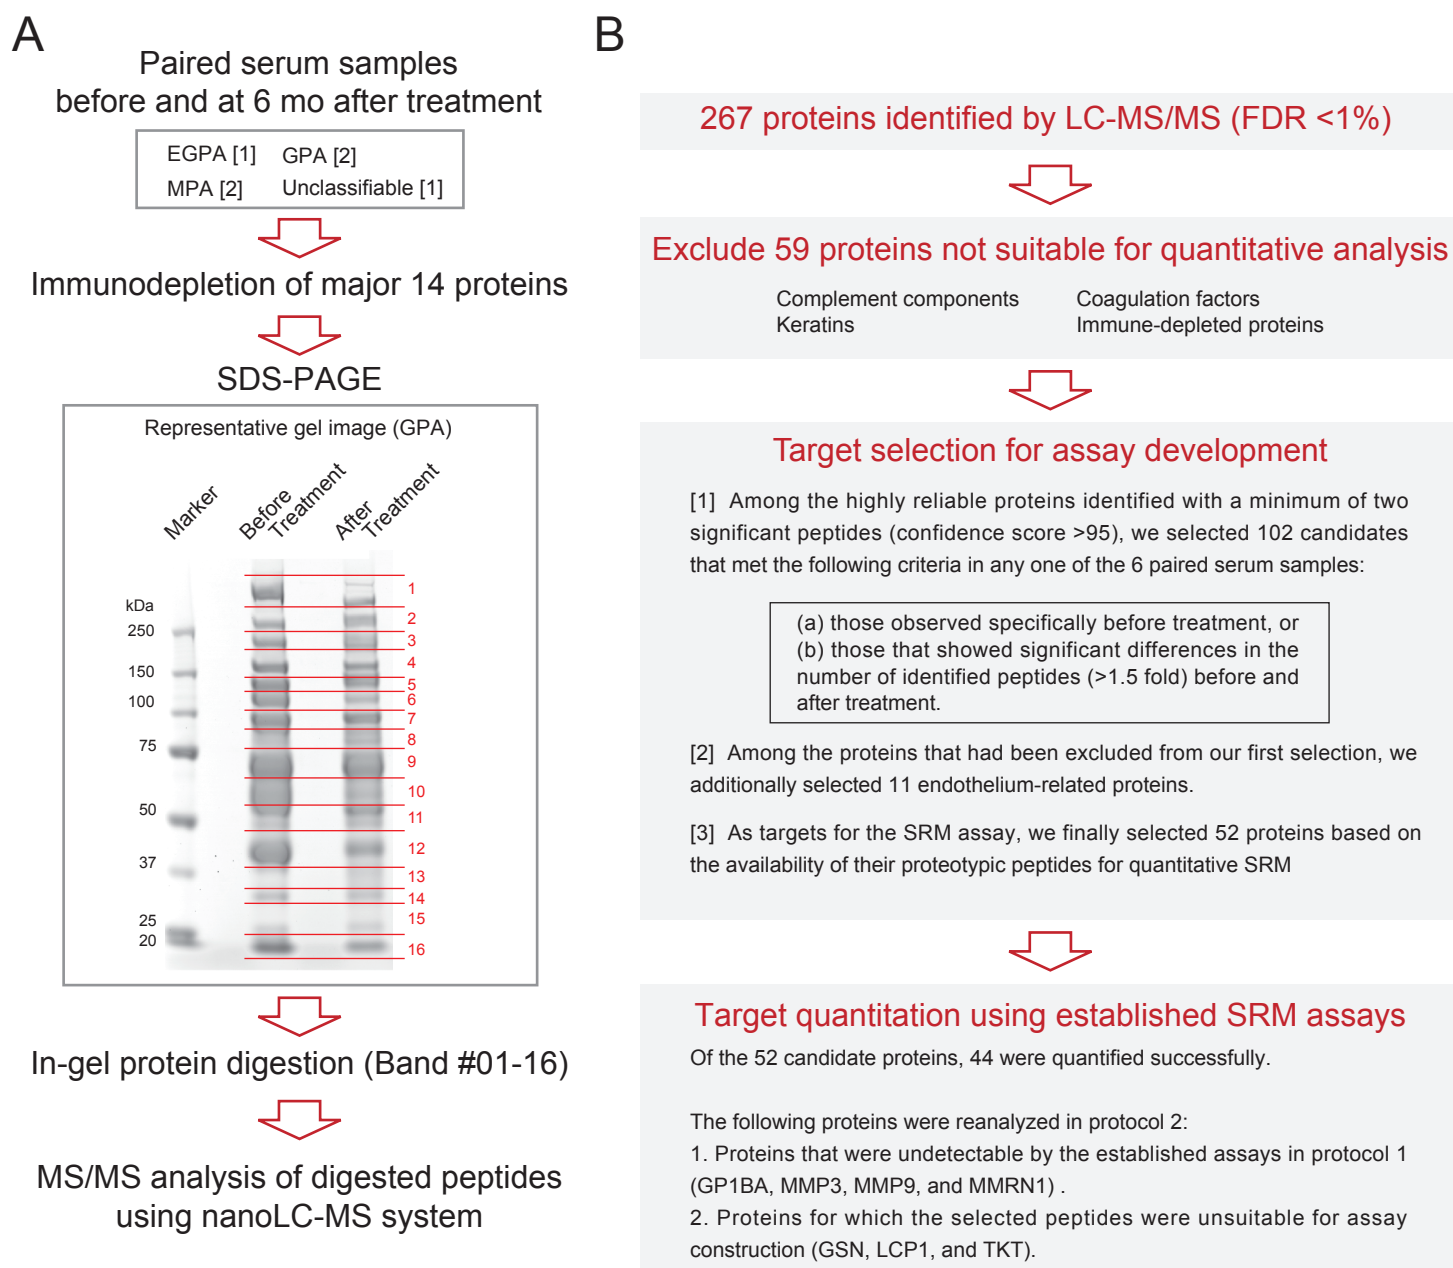

**Figure S1. Screening of marker candidates in serum samples from AAV patients. (A)** Proteomic profiling of the AAV serum proteome using LC-MS/MS. **(B)** Candidate selection for assay development in protocol 1.

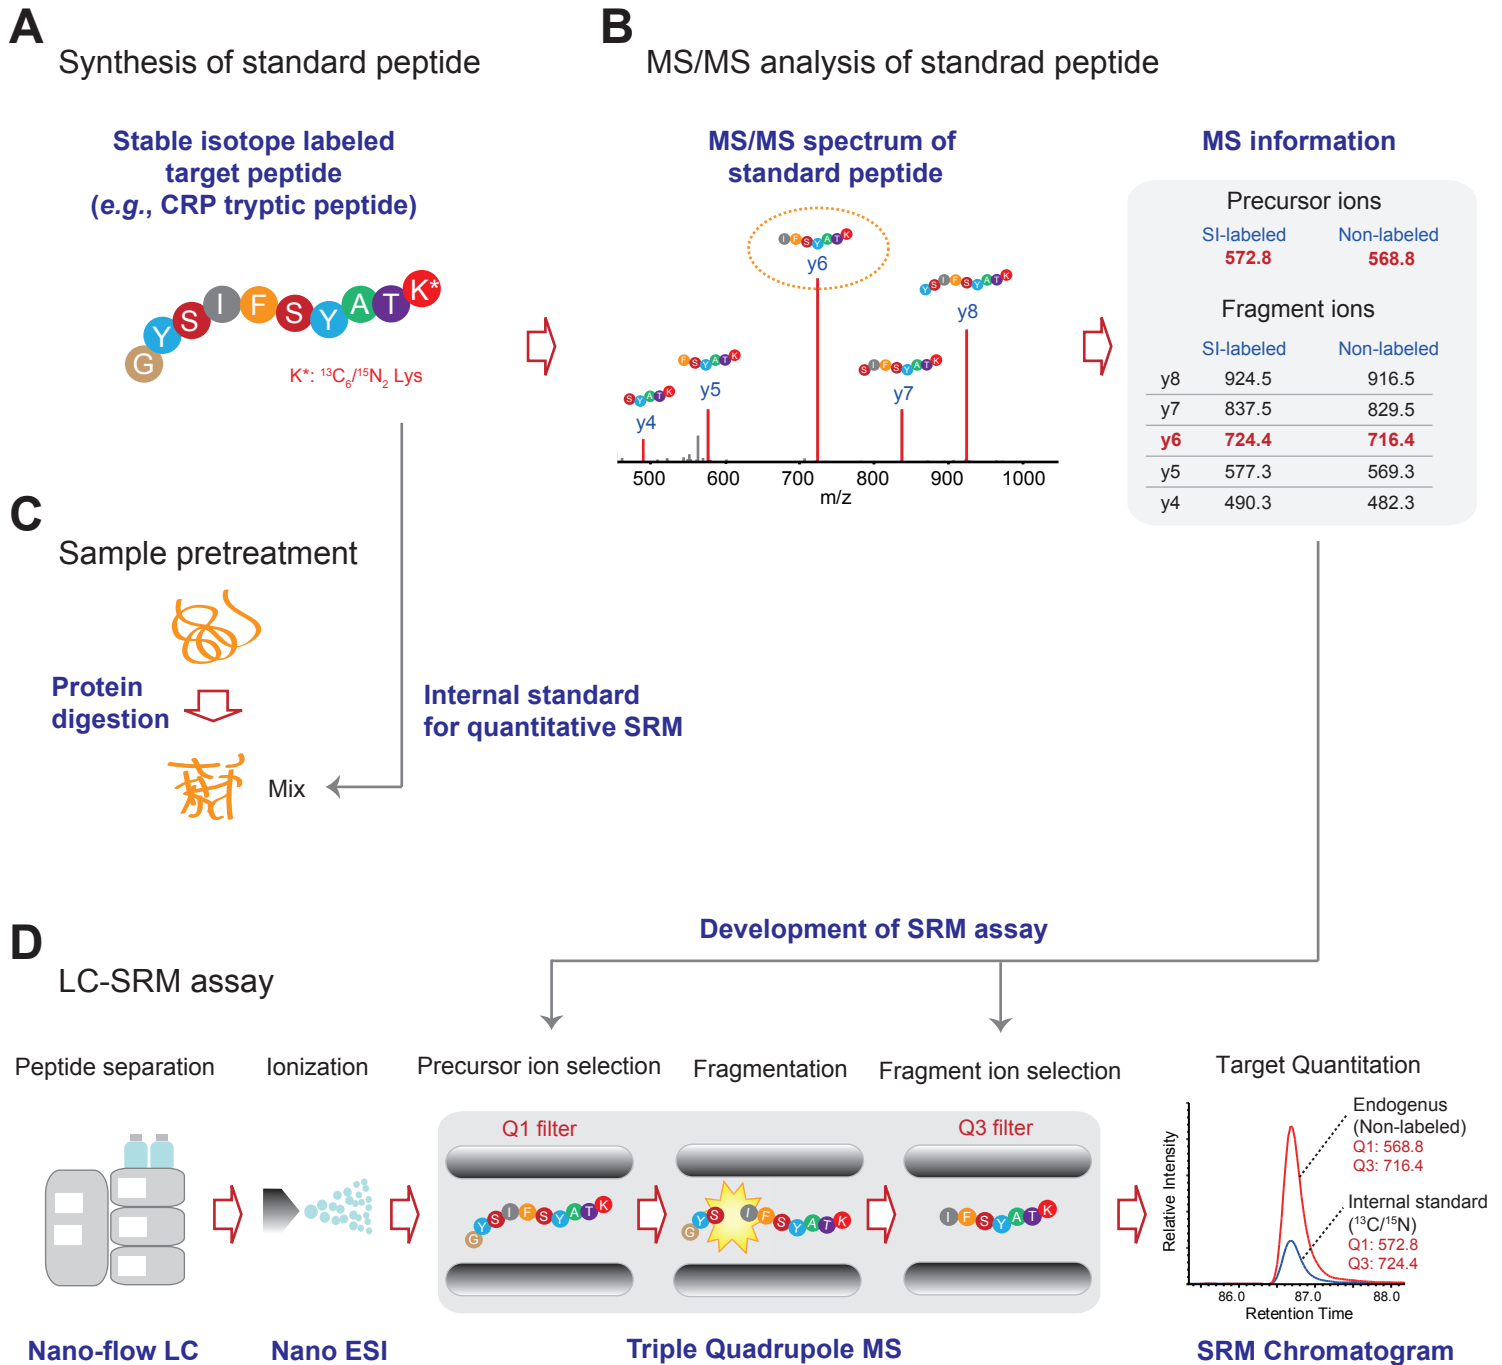

**Figure S2. Schematic diagram of targeted proteomics using the LC-SRM assay.** (A) Targeted peptides were synthesized with  $^{13}C/^{15}N$  labeled amino acids, and used as reference peptides. (B) Based on the MS/MS spectra of the SI-labeled reference peptides, we selected a set of fragment ions for each precursor ion and finally established the SRM assays. (C) Prior to SRM analysis, serum protein samples were digested with trypsin/Lys-C and mixed with the reference peptide. (D) Targeted peptides present in the digested serum sample were detected by LC-SRM analysis. Quantitation of the endogenous target was performed by comparing the area of an endogenous peptide with that of the corresponding SI-labeled reference peptide.

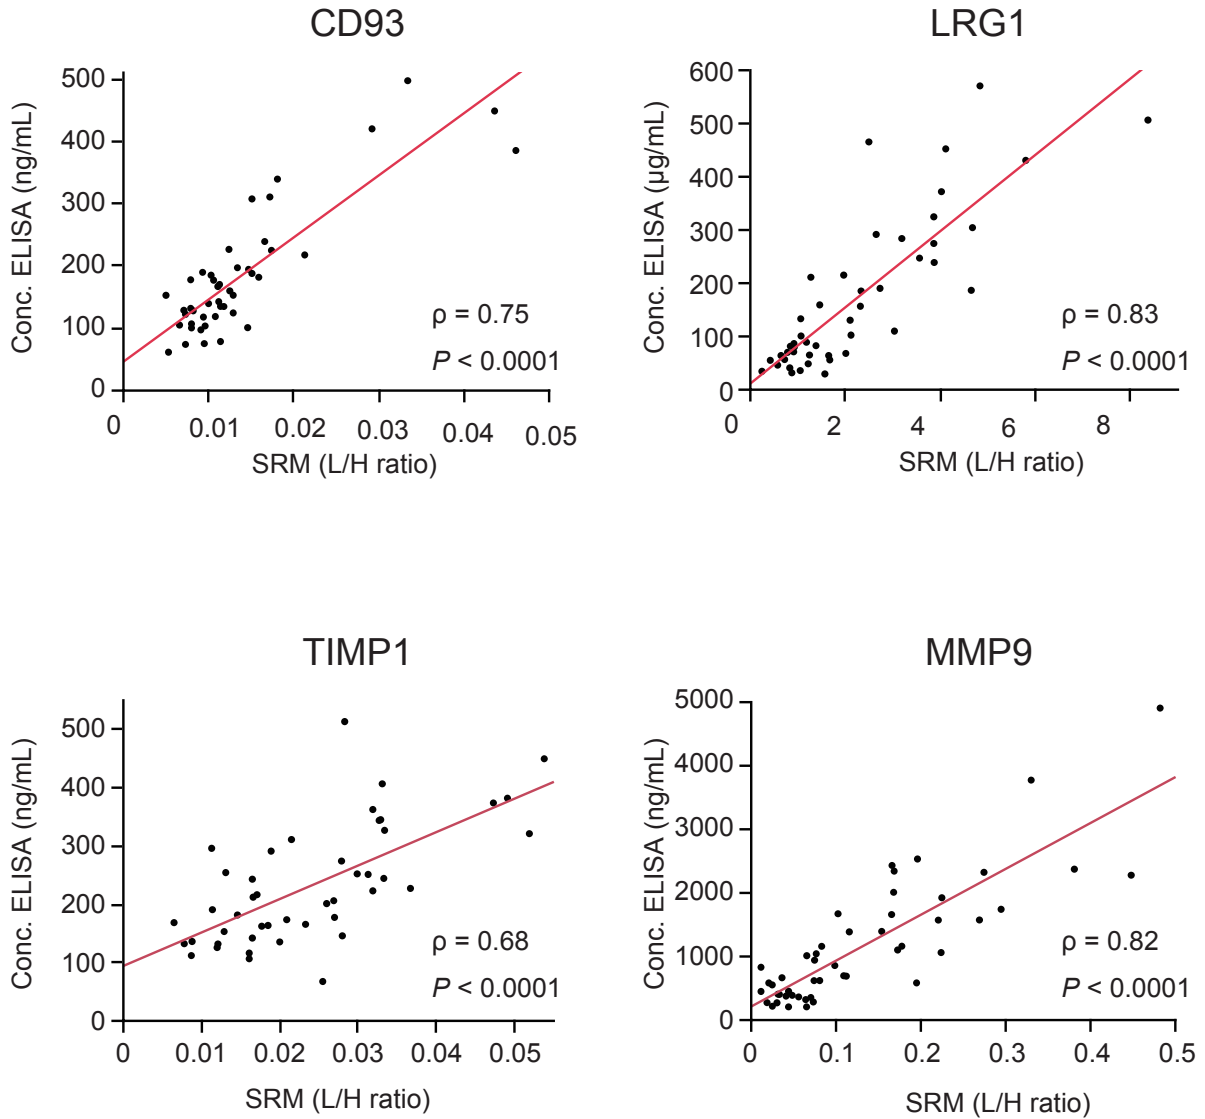

**Figure S3. Correlations between the light to heavy ratio of SRM and the ELISA titers of markers.** Spearman's rank correlation coefficients for four representative biomarkers are shown.

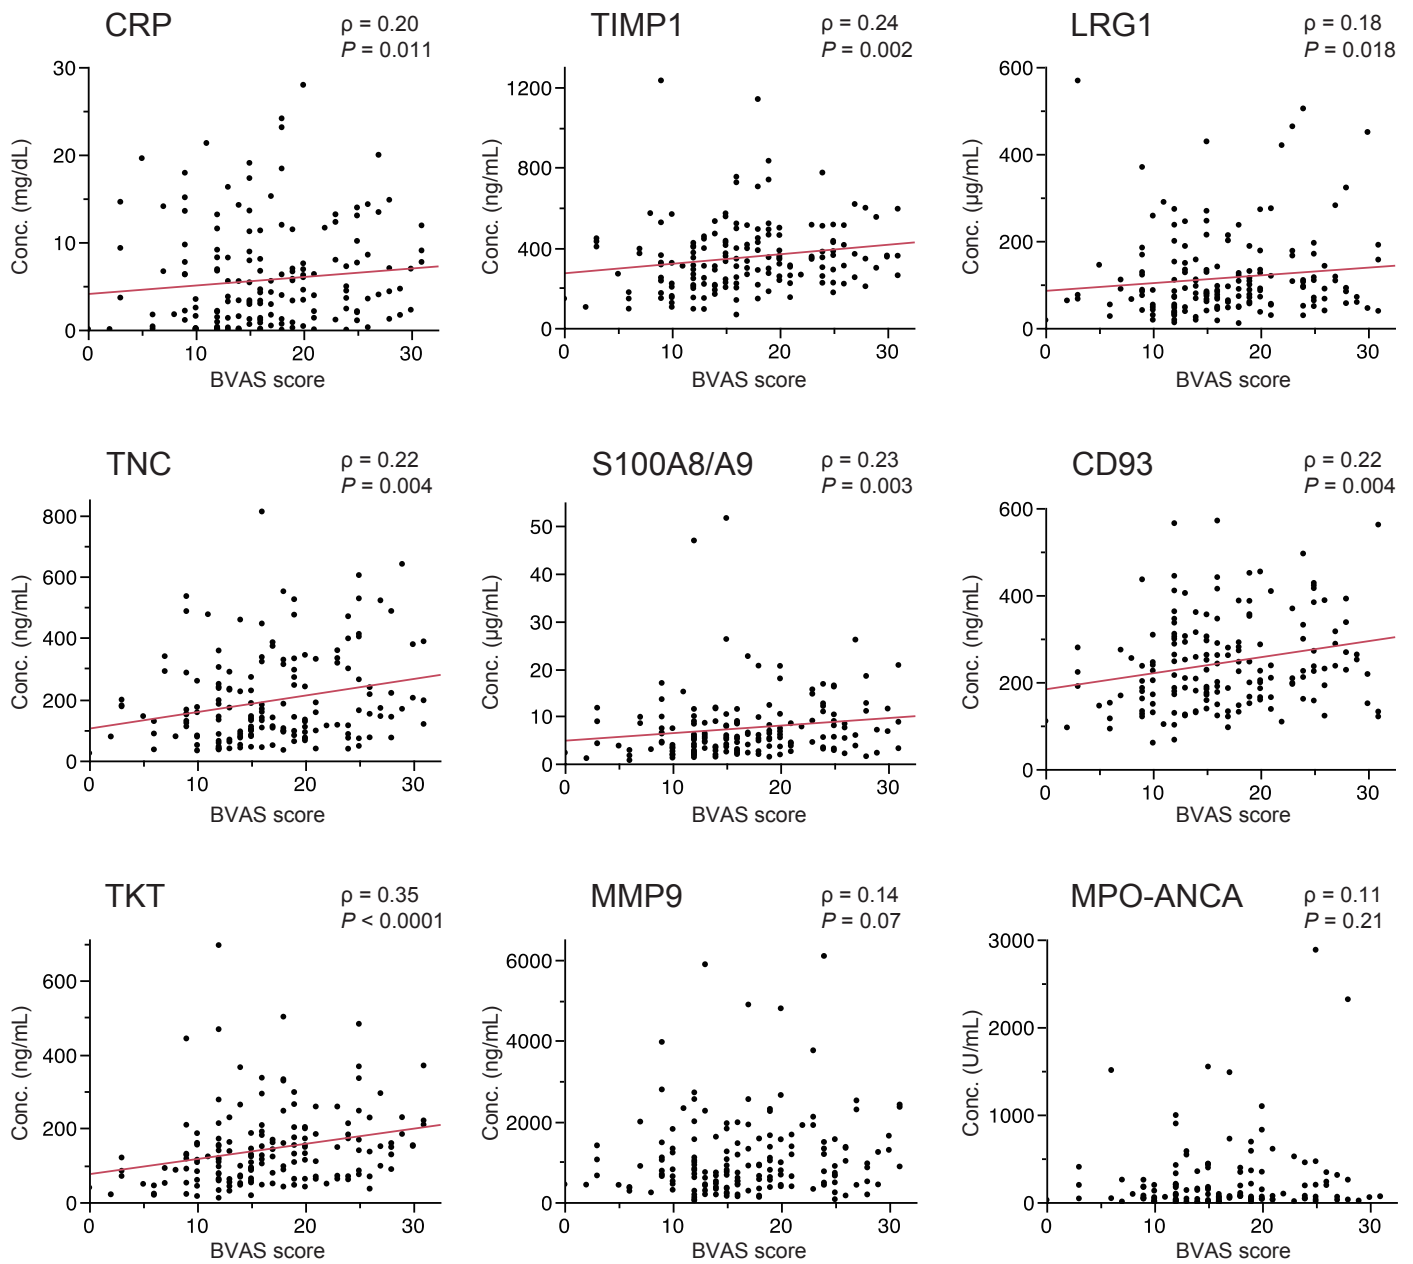

**Figure S4. Correlation of marker levels with total BVAS score in AAV patients.**

Correlations of marker levels, except for MPO-ANCA with total BVAS score, were analyzed in the 169 AAV patients before treatment. Correlations of MPO-ANCA titers with total BVAS score were analyzed in the 137 MPO-ANCA-positive patients. Spearman's rank correlation coefficients for all pairs of biomarkers are shown. MPO-ANCA and MMP9 showed no correlation with total BVAS score.

Table S1 Clinical data on healthy donors and patients with RA, SLE, and infectious diseases

| Characteristics          | Healthy donors | RA               | SLE        | Infectious diseases |
|--------------------------|----------------|------------------|------------|---------------------|
| Number                   | n = 30         | n = 30           | n = 21     | n = 25              |
| Male/female, n/n         | 9/21           | 5/25             | 1/20       | 16/9                |
| Age, years               | 29 (25-38)     | 66 (45-72)       | 39 (23-45) | 79 (74-88)          |
| Disease duration, months |                | 8.5 (3.3-60)     | 2 (1-4)    |                     |
| SDAI                     |                | 16.9 (12.0-30.4) |            |                     |
| SLEDAI score             |                |                  | 16 (12-18) |                     |

Values are median (IQR).

RA, rheumatoid arthritis; SLE, systemic lupus erythematosus; SDAI, simplified disease activity index; SLEDAI, systemic lupus erythematosus disease activity index.

Table S2 (See Excel file: Table S2.xlsx)

Table S3. Selected marker candidates for SRM assay development

| Protocol 1: Selected proteins based on the following criteria: 1) those specifically observed before treatment, or 2) those that showed significant differences in the number of identified peptides (>1.5 folds) before and after treatment (total 42 proteins) |               |                                                                              |
|------------------------------------------------------------------------------------------------------------------------------------------------------------------------------------------------------------------------------------------------------------------|---------------|------------------------------------------------------------------------------|
| Biological function                                                                                                                                                                                                                                              | Symbol        | Selected peptides from the peptide dataset observed in our LC-MS/MS analysis |
| Cell adhesion and extracellular matrix organization                                                                                                                                                                                                              | ACTB          | GYSFTTTAER                                                                   |
|                                                                                                                                                                                                                                                                  | CDH5          | DTGENLETPSSFTIK                                                              |
|                                                                                                                                                                                                                                                                  | COMP          | DTDLDGFPDEK                                                                  |
|                                                                                                                                                                                                                                                                  | FCGBP         | LVDPQGPLK                                                                    |
|                                                                                                                                                                                                                                                                  | LRG1          | ALGHLDLDSG NR                                                                |
|                                                                                                                                                                                                                                                                  | MMP9 *        | FQTFEGDLK                                                                    |
|                                                                                                                                                                                                                                                                  | PRG4          | GGSIQQYIYK                                                                   |
|                                                                                                                                                                                                                                                                  | SEPP1         | LPTDSELAPR                                                                   |
|                                                                                                                                                                                                                                                                  | TGFBI         | IPSETLNR                                                                     |
|                                                                                                                                                                                                                                                                  | THBS1         | AQGYSGLSVK                                                                   |
|                                                                                                                                                                                                                                                                  | TNC           | ITAQQQYELR                                                                   |
| VASN                                                                                                                                                                                                                                                             | YLGSSSVQLR    |                                                                              |
| VCAM1                                                                                                                                                                                                                                                            | SIDGAYTIR     |                                                                              |
| Angiogenesis and wound healing                                                                                                                                                                                                                                   | GPIBA *       | GLGELQELYLK                                                                  |
|                                                                                                                                                                                                                                                                  | KNG1          | TVGSDTFYSFK                                                                  |
|                                                                                                                                                                                                                                                                  | LPA           | GISSTVTGR                                                                    |
|                                                                                                                                                                                                                                                                  | PFN1          | SSFYVNGLTLGGQK                                                               |
|                                                                                                                                                                                                                                                                  | PLG           | LFLEPTR                                                                      |
|                                                                                                                                                                                                                                                                  | PPBP          | NIQSLEVIGK                                                                   |
|                                                                                                                                                                                                                                                                  | PROC          | LGEYDLR                                                                      |
|                                                                                                                                                                                                                                                                  | PROS1         | IETISHEDLQR                                                                  |
|                                                                                                                                                                                                                                                                  | SERPINA10     | LFDEINPETK                                                                   |
|                                                                                                                                                                                                                                                                  | SERPINA4      | FFSAQTNR                                                                     |
|                                                                                                                                                                                                                                                                  | VWF           | TNTGLALR                                                                     |
| Inflammatory response                                                                                                                                                                                                                                            | CD5L          | LVGGDNLCSGR                                                                  |
|                                                                                                                                                                                                                                                                  | CHI3L1        | ILGQQVPYATK                                                                  |
|                                                                                                                                                                                                                                                                  | CRP           | GYSIFS YATK                                                                  |
|                                                                                                                                                                                                                                                                  | LBP           | ITGFLKPGK                                                                    |
|                                                                                                                                                                                                                                                                  | LTF           | DGAGD VAFIR                                                                  |
|                                                                                                                                                                                                                                                                  | LYZ           | STDYGIFQINSR                                                                 |
|                                                                                                                                                                                                                                                                  | MASP1         | DSDLLSPSDFK                                                                  |
|                                                                                                                                                                                                                                                                  | MBL2          | TEGQFVDLTGNR                                                                 |
|                                                                                                                                                                                                                                                                  | PF4           | TTSQVRPR                                                                     |
|                                                                                                                                                                                                                                                                  | PROZ          | ENFVLTTAK                                                                    |
|                                                                                                                                                                                                                                                                  | S100A8        | ALNSIIDVYHK                                                                  |
| SAA2-SAA4                                                                                                                                                                                                                                                        | FRPDGLPK      |                                                                              |
| SERPINA3                                                                                                                                                                                                                                                         | ADLSGITGAR    |                                                                              |
| Regulation of metabolism and basic cellular processes                                                                                                                                                                                                            | ALDOB         | LDQGGAPLAGTNK                                                                |
|                                                                                                                                                                                                                                                                  | HGFAC         | TTDVTQTFGIEK                                                                 |
|                                                                                                                                                                                                                                                                  | MST1          | SVTLNQR                                                                      |
|                                                                                                                                                                                                                                                                  | PTGDS         | AQGFTEDTIVFLPQTDK                                                            |
| SHBG                                                                                                                                                                                                                                                             | TSSSFEVR      |                                                                              |
| Protocol 1: Endothelium-related proteins (total 10 proteins)                                                                                                                                                                                                     |               |                                                                              |
| Biological function                                                                                                                                                                                                                                              | Symbol        | Selected peptides from the peptide dataset observed in our LC-MS/MS analysis |
| Cell adhesion and extracellular matrix organization                                                                                                                                                                                                              | CD93          | VLAQLLR                                                                      |
|                                                                                                                                                                                                                                                                  | CDH1          | MALEVGDYK                                                                    |
|                                                                                                                                                                                                                                                                  | ICAM1         | LLGIETPLPK                                                                   |
|                                                                                                                                                                                                                                                                  | LYVE1         | DQVETALK                                                                     |
|                                                                                                                                                                                                                                                                  | MMP2          | IDAVYEAPQEEK                                                                 |
| MMP3 *                                                                                                                                                                                                                                                           | DAVDSAVEK     |                                                                              |
| MMRN1 *                                                                                                                                                                                                                                                          | LVEENALAPDFSK |                                                                              |
| Angiogenesis and wound healing                                                                                                                                                                                                                                   | MCAM          | EETGQVLER                                                                    |
|                                                                                                                                                                                                                                                                  | TIMP1         | GFQALGDAADIR                                                                 |
| Inflammatory response                                                                                                                                                                                                                                            | B2M           | VNHVTL SQPK                                                                  |

Table S3. Continued

| Protocol 2: Endothelium-related proteins selected from public databases <sup>†</sup> (total 87 proteins) |                    |                                                                                    |                       |
|----------------------------------------------------------------------------------------------------------|--------------------|------------------------------------------------------------------------------------|-----------------------|
| Biological function                                                                                      | Symbol             | Selected peptides from the proteomics information of public databases <sup>§</sup> |                       |
| Cell adhesion and extracellular matrix organization                                                      | AOC3               | NLVTMTTAPR                                                                         | AAALAHLLDR            |
|                                                                                                          | CD34               | LGILDFTEQDVASHQSYSQK                                                               | QHVVADTEL             |
|                                                                                                          | CDH13              | INENTGSVSVTR                                                                       | DIQGSLLQDIFK          |
|                                                                                                          | CIB1               | AQVPFEQILSLPELK                                                                    | DGTINLSEFQHVISR       |
|                                                                                                          | CLEC14A            | GQLPISVTCIADEIGAR                                                                  | CAVLQATGGVEPAGWK      |
|                                                                                                          | COL4A1             | AHGQDLGTAGSCLR                                                                     | ILYHGYSLLYVQGNER      |
|                                                                                                          | COL4A2             | GLDGYQGPDPGR                                                                       | SVSIGYLLVK            |
|                                                                                                          | CX3CL1             | AQDGGPVGTELFR                                                                      | IPVALLIHYQQNQASCCK    |
|                                                                                                          | DLL4               | DNLIPAAQLK                                                                         | AAGSGVFQLQLQEFINER    |
|                                                                                                          | EMILIN1            | LEQLGGLLANVSGELGGR                                                                 | APAPASAPPGPSEELLR     |
|                                                                                                          | ENG                | GPITSAEELNDPQSILLR                                                                 | TQILEWAAER            |
|                                                                                                          | ESM1               | CQPSNGEDPFGEEFGICK                                                                 | TVLDDCGCCR            |
|                                                                                                          | FBLN5              | YPGAYYIFQIK                                                                        | DQPFTILYR             |
|                                                                                                          | GJA4               | LLDQVQEHSTVVVGK                                                                    | ALAAVER               |
|                                                                                                          | GP1BB              | LLPYLAEDELK                                                                        | TAHLGANPWR            |
|                                                                                                          | ICAM2              | ILLDEQAQWK                                                                         | VPTVEPLDSLTLFLFR      |
|                                                                                                          | ICAM3              | TFVLPVTPPR                                                                         | TSLTVVLLR             |
|                                                                                                          | ICAM4              | GPGWVSYQLLDVR                                                                      | GSPLAPSGTSPFWVR       |
|                                                                                                          | ITGA4              | AYIFSIDEK                                                                          | SDSAVLLR              |
|                                                                                                          | ITGAM              | ILVVITDGEK                                                                         | LFTALFPFEK            |
|                                                                                                          | ITGAX              | GAVYLFHGVLPSPISPSHSQR                                                              | GGQVSVCPPLR           |
|                                                                                                          | ITGB2              | LGAILTPNDGR                                                                        | LAENNIQPIFAVTSR       |
|                                                                                                          | ITGB7              | GEGATQLAPQR                                                                        | IGFGSFVDK             |
|                                                                                                          | JUP                | LLNDEDPVVVTK                                                                       | NEGATATYAAAFLFR       |
|                                                                                                          | LAMB2              | LQEQTLEFLVASVPK                                                                    | GSCYPATGDLLVGR        |
|                                                                                                          | LCP1               | TENLNDEK                                                                           | IGNFSTDIK             |
|                                                                                                          | LGALS3             | GNDVAFHFNPR                                                                        | VAVNDAHLLQYNHR        |
|                                                                                                          | MADCAM1            | GLDTSLGAVQSDTGR                                                                    | LLPQVSAWAGLR          |
|                                                                                                          | MMP3 <sup>*</sup>  | GEDTSMNLVQK                                                                        | LSDTLEVMR             |
|                                                                                                          | MMP9 <sup>*</sup>  | SLGPALLLLQK                                                                        | AVIDDAFAR             |
|                                                                                                          | MMRN1 <sup>*</sup> | HSWTIPEDGNSQK                                                                      | FNPGAESVVLNSNLT       |
|                                                                                                          | PECAM1             | STESYFIPEVR                                                                        | DQNFVILEFPVEEQDR      |
|                                                                                                          | PLVAP              | VAEEQLVECVK                                                                        | SLDNLGYNLYHPLGSELASIR |
|                                                                                                          | PODXL              | LASVPGSQTVVVK                                                                      | ATFNPAQDK             |
| SELE                                                                                                     | CAHSPIGEFTYK       | FACPEGWTLNGSAAR                                                                    |                       |
| SELP                                                                                                     | ALTNEAENWADNPNK    | STCQFICDEGYSLSGPER                                                                 |                       |
| SULF2                                                                                                    | VYHVGLGDAAQPR      | SVAIEVDGR                                                                          |                       |
| TPSAB1                                                                                                   | EQHLYYQDQLLPVSR    | VGIVGGQEAPR                                                                        |                       |
| VASH1                                                                                                    | TYFSGNYFR          | DGGVPPFVNR                                                                         |                       |
| Angiogenesis and wound healing                                                                           | ANGPT1             | QSSLILHGADFSTK                                                                     | LEIQLENSLSTYK         |
|                                                                                                          | ANPEP              | ALEQALEK                                                                           | DHSAIPVINR            |
|                                                                                                          | CD248              | LLWIGLQR                                                                           | VDSL VGAGPASR         |
|                                                                                                          | F2R                | NESGLTEYR                                                                          | ATNATLDPK             |
|                                                                                                          | FIGF               | STNTFFKPPCVNVFR                                                                    | AASSLEELLR            |
|                                                                                                          | FLT4               | HATLSLSIPR                                                                         | DFEQPFINKPDTLLVNR     |
|                                                                                                          | GP1BA <sup>*</sup> | LTSPLGALR                                                                          | LTQLNDR               |
|                                                                                                          | KDR                | LGPQPLPIHV GELPTPVCK                                                               | FLSTLTIDGVTR          |
|                                                                                                          | LPL                | ITGLDPAGPNFEYAEAPSR                                                                | LSPDDADFVDVLTFTFR     |
|                                                                                                          | NOS3               | AQSYAQQQLGR                                                                        | LSAQAEGLQLLPGLIHVHR   |
|                                                                                                          | OLR1               | CLSLDAK                                                                            | GAVSQTYPSGTCAIYQR     |
|                                                                                                          | PDGFB              | SHSGGELESAR                                                                        | TEVFEISR              |
|                                                                                                          | PROCR              | TLAFPLTIR                                                                          | CFLGCELPPEGR          |
|                                                                                                          | S1PR1              | LTPAQWFLR                                                                          | TCDILFR               |
|                                                                                                          | SELL               | SLTEEAENWGDGEPNPK                                                                  | AEIEYLEK              |
|                                                                                                          | SELPLG             | SPGLTPEPR                                                                          | ALGPLLAR              |
|                                                                                                          | TFPI               | FFFNIFTR                                                                           | IAYEEIFVK             |
|                                                                                                          | THBD               | SSVAADVISLLLNGDGGVGR                                                               | LAADQHR               |
|                                                                                                          | TIE1               | VSWSLPLVPGPLVGDGFLLR                                                               | FFLTCSVGEAGAGR        |
| Inflammatory response                                                                                    | AIF1L              | ANESSPKPVGPPPER                                                                    | MISEVTGGVSDTISYR      |
|                                                                                                          | ANXA1              | ALTGHLEEVVLALLK                                                                    | CATSKPAFFAEK          |
|                                                                                                          | AZU1               | GPDDFFTR                                                                           | HFCGGALIHAR           |
|                                                                                                          | BDKRB1             | ANLFSIFLVVAISQDR                                                                   | SLAPISSSHAR           |
|                                                                                                          | BDKRB2             | LQDWAGSR                                                                           | LGILSSCQDER           |
|                                                                                                          | ELANE              | QVFAVQR                                                                            | VVLGAHNLSR            |
|                                                                                                          | PTGIR              | NSSLGLAR                                                                           | APSAPVGK              |
|                                                                                                          | S100A9             | LGHPTLNLQGEFK                                                                      | NIETIINTFHQYSVK       |



Table S3. Continued

|                      |           |                     |                     |
|----------------------|-----------|---------------------|---------------------|
|                      | AHSP      | DLISAGLK            | QELNTLANPFLAK       |
|                      | ANGPTL1   | DNSLELSQLENK        | ITGPICVNTK          |
|                      | ANGPTL2   | DHDVYTGNCAYHYQK     | VFAEYASFR           |
|                      | CAT       | AFYVNVLNNEEQR       | FNTANDDNVTQVR       |
|                      | EDN1      | ALENLLPTK           | SSFHDPK             |
|                      | EDN2      | RPWTEAGAVPSR        | TGATTGELLQR         |
|                      | EDN3      | GVSQAPTAAR          | ACLFCTQTLDVSSNSR    |
|                      | GSN       | AGALNSNDAFVLK       | TGAQELLR            |
|                      | HIST1H2AG | VTIAQGGVLPNIQAVLLPK | AGLQFPVGR           |
| Regulation of        | HIST1H3A  | STELLIR             | YRPGTVALR           |
| metabolism and basic | HIST1H4A  | DAVITYTEHAK         | VFLENVIR            |
| cellular processes   | HTR2B     | LTWLTVSTVFQR        | KPIQANQYNSR         |
|                      | KCNA10    | GLQILGQTLK          | ILISESTNHETAFSK     |
|                      | KLF2      | GLLTPPASPLELLEAKPK  | FLLAPPGR            |
|                      | LSP1      | WETGEVQAQSAAK       | IDQWLEQYTQAIETAGR   |
|                      | NCF1      | CPHLLDFFK           | STATDITGPILQTYR     |
|                      | PRSS23    | GTPLPTYEEAK         | LEVSSSCGPQCHK       |
|                      | RASD2     | TLSSGNCTLSVPAK      | FEDQYTPTIEDFHR      |
|                      | SOD3      | AVVVHAGEDDLGR       | AGLAASLAGPHSIVGR    |
|                      | TBXA2R    | LSTRPR              | SLSLQPQLTQR         |
|                      | TKT       | AVELAANTK           | ILATPPQEDAPSVDIANIR |

\* Proteins analyzed in both protocol 1 and 2 by using different target peptides

† GeneCards ([www.genecards.org](http://www.genecards.org)) and The Human Protein Atlas ([www.proteinatlas.org](http://www.proteinatlas.org))

§ PeptideAtlas ([www.peptideatlas.org](http://www.peptideatlas.org)) and Plasma Proteome Database ([www.plasmaproteomedatabase.org](http://www.plasmaproteomedatabase.org))

Table S4. A set of established SRM transitions for the detection of marker candidates

| Protocol 1 (44 proteins) |                     |                                                              |                  |                  |             |                |              |                                                                     |                  |                  |             |                |              |
|--------------------------|---------------------|--------------------------------------------------------------|------------------|------------------|-------------|----------------|--------------|---------------------------------------------------------------------|------------------|------------------|-------------|----------------|--------------|
| Protein Name             | Peptide Sequence    | Light ( <sup>12</sup> C/ <sup>14</sup> N-K or R; Endogenous) |                  |                  |             |                |              | Heavy ( <sup>13</sup> C/ <sup>15</sup> N-K or R; Internal Standard) |                  |                  |             |                |              |
|                          |                     | Precursor m/z                                                | Precursor Charge | Collision Energy | Product m/z | Product Charge | Fragment Ion | Precursor m/z                                                       | Precursor Charge | Collision Energy | Product m/z | Product Charge | Fragment Ion |
| ACTB                     | GYSFTTAAER          | 566.8                                                        | 2                | 29.3             | 678.3       | 1              | y6           | 571.8                                                               | 2                | 29.3             | 688.4       | 1              | y6           |
| ALDOB                    | LDQGGAPLAGTNK       | 621.3                                                        | 2                | 31.2             | 700.4       | 1              | y7           | 625.3                                                               | 2                | 31.2             | 708.4       | 1              | y7           |
| B2M                      | VNHVTLSPQPK         | 561.8                                                        | 2                | 29.1             | 673.4       | 1              | y6           | 565.8                                                               | 2                | 29.1             | 681.4       | 1              | y6           |
| CD93                     | VLAQLLR             | 406.8                                                        | 2                | 23.5             | 600.4       | 1              | y5           | 411.8                                                               | 2                | 23.5             | 610.4       | 1              | y5           |
| CDH1                     | MALEVGDYK           | 513.3                                                        | 2                | 27.3             | 823.4       | 1              | y7           | 517.3                                                               | 2                | 27.3             | 831.4       | 1              | y7           |
| CDH5                     | DTGENLETPSSFTIK     | 819.9                                                        | 2                | 38.4             | 880.5       | 1              | y8           | 823.9                                                               | 2                | 38.4             | 888.5       | 1              | y8           |
| CHI3L1                   | ILGQQVPYATK         | 609.3                                                        | 2                | 30.8             | 579.3       | 1              | y5           | 613.4                                                               | 2                | 30.8             | 587.3       | 1              | y5           |
| COMP                     | DTDLDGFPDEK         | 626.3                                                        | 2                | 31.4             | 807.4       | 1              | y7           | 630.3                                                               | 2                | 31.4             | 815.4       | 1              | y7           |
| CRP                      | GYSIFSYATK          | 568.8                                                        | 2                | 29.3             | 716.4       | 1              | y6           | 572.8                                                               | 2                | 29.3             | 724.4       | 1              | y6           |
| FCGBP                    | LVDPQGPLK           | 483.8                                                        | 2                | 26.3             | 754.4       | 1              | y7           | 487.8                                                               | 2                | 26.3             | 762.4       | 1              | y7           |
| HGFAC                    | TTDVTQTFGIEK        | 670.3                                                        | 2                | 33.0             | 694.4       | 1              | y6           | 674.3                                                               | 2                | 33.0             | 702.4       | 1              | y6           |
| ICAM1                    | LLGIETPLPK          | 540.8                                                        | 2                | 28.3             | 854.5       | 1              | y8           | 544.8                                                               | 2                | 28.3             | 862.5       | 1              | y8           |
| KNG1                     | TVGSDTFYSFK         | 626.3                                                        | 2                | 31.4             | 792.4       | 1              | y6           | 630.3                                                               | 2                | 31.4             | 800.4       | 1              | y6           |
| LBP                      | ITGFLKPGK           | 480.8                                                        | 2                | 26.2             | 746.5       | 1              | y7           | 488.8                                                               | 2                | 26.2             | 762.5       | 1              | y7           |
| LPA                      | GISSTVTGTR          | 489.8                                                        | 2                | 26.5             | 721.4       | 1              | y7           | 494.8                                                               | 2                | 26.5             | 731.4       | 1              | y7           |
| LRG1                     | ALGHLDLGSGNR        | 576.8                                                        | 2                | 29.6             | 774.4       | 1              | y7           | 581.8                                                               | 2                | 29.6             | 784.4       | 1              | y7           |
| LTF                      | DGAGDVAFIR          | 510.8                                                        | 2                | 27.2             | 777.4       | 1              | y7           | 515.8                                                               | 2                | 27.2             | 787.4       | 1              | y7           |
| LYVE1                    | DQVETALK            | 452.2                                                        | 2                | 25.1             | 660.4       | 1              | y6           | 456.2                                                               | 2                | 25.1             | 668.4       | 1              | y6           |
| LYZ                      | STDYGFQINSR         | 700.8                                                        | 2                | 34.1             | 764.4       | 1              | y6           | 705.8                                                               | 2                | 34.1             | 774.4       | 1              | y6           |
| MASP1                    | DSDLLSPSDFK         | 612.3                                                        | 2                | 30.9             | 680.3       | 1              | y6           | 616.3                                                               | 2                | 30.9             | 688.3       | 1              | y6           |
| MBL2                     | TEGQFVDLTGNR        | 668.8                                                        | 2                | 32.9             | 675.3       | 1              | y6           | 673.8                                                               | 2                | 32.9             | 685.4       | 1              | y6           |
| MCAM                     | EETGQVLR            | 530.8                                                        | 2                | 28.0             | 802.4       | 1              | y7           | 535.8                                                               | 2                | 28.0             | 812.5       | 1              | y7           |
| MMP2                     | IDAVYEAPQEEK        | 696.3                                                        | 2                | 33.9             | 830.4       | 1              | y7           | 700.3                                                               | 2                | 33.9             | 838.4       | 1              | y7           |
| MST1                     | SVTLNQR             | 409.2                                                        | 2                | 23.6             | 631.4       | 1              | y5           | 414.2                                                               | 2                | 23.6             | 641.4       | 1              | y5           |
| PFN1                     | SSFYVNGLTGGQK       | 735.9                                                        | 2                | 35.3             | 887.5       | 1              | y9           | 739.9                                                               | 2                | 35.3             | 895.5       | 1              | y9           |
| PLG                      | LFLEPTR             | 438.3                                                        | 2                | 24.6             | 615.3       | 1              | y5           | 443.3                                                               | 2                | 24.6             | 625.4       | 1              | y5           |
| PPBP                     | NIQSLELVIGK         | 550.8                                                        | 2                | 28.7             | 873.5       | 1              | y8           | 554.8                                                               | 2                | 28.7             | 881.5       | 1              | y8           |
| PRG4                     | GGSIQYIYK           | 578.8                                                        | 2                | 29.7             | 842.4       | 1              | y6           | 582.8                                                               | 2                | 29.7             | 850.5       | 1              | y6           |
| PROC                     | LGEYDLR             | 433.2                                                        | 2                | 24.5             | 566.3       | 1              | y4           | 438.2                                                               | 2                | 24.5             | 576.3       | 1              | y4           |
| PROS1                    | IETISHEDLQR         | 447.6                                                        | 3                | 21.9             | 549.8       | 2              | y9           | 450.9                                                               | 3                | 21.9             | 554.8       | 2              | y9           |
| PROZ                     | ENFVLTTAK           | 511.8                                                        | 2                | 27.3             | 533.3       | 1              | y5           | 515.8                                                               | 2                | 27.3             | 541.3       | 1              | y5           |
| SI00A8                   | ALNSIDVYHK          | 636.9                                                        | 2                | 31.8             | 774.4       | 1              | y6           | 640.9                                                               | 2                | 31.8             | 782.4       | 1              | y6           |
| SAA2-SAA4                | FRPDGLPK            | 465.3                                                        | 2                | 25.6             | 686.4       | 1              | b6           | 474.3                                                               | 2                | 25.6             | 696.4       | 1              | b6           |
| SEPP1                    | LPTDSELAPR          | 549.8                                                        | 2                | 28.6             | 493.3       | 2              | y9           | 554.8                                                               | 2                | 28.6             | 498.3       | 2              | y9           |
| SERPINA10                | LFDEINPETK          | 603.3                                                        | 2                | 30.6             | 945.5       | 1              | y8           | 607.3                                                               | 2                | 30.6             | 953.5       | 1              | y8           |
| SERPINA4                 | FFSAQTNR            | 485.7                                                        | 2                | 26.3             | 676.3       | 1              | y6           | 490.7                                                               | 2                | 26.3             | 686.3       | 1              | y6           |
| SHBG                     | TSSSFEVR            | 456.7                                                        | 2                | 25.3             | 724.4       | 1              | y6           | 461.7                                                               | 2                | 25.3             | 734.4       | 1              | y6           |
| TGFBI                    | IPSETLNR            | 465.3                                                        | 2                | 25.6             | 719.4       | 1              | y6           | 470.3                                                               | 2                | 25.6             | 729.4       | 1              | y6           |
| THBS1                    | AQYSGLSVK           | 505.3                                                        | 2                | 27.0             | 810.4       | 1              | y8           | 509.3                                                               | 2                | 27.0             | 818.4       | 1              | y8           |
| TIMP1                    | GFOALGDAADIR        | 617.3                                                        | 2                | 31.1             | 717.4       | 1              | y7           | 622.3                                                               | 2                | 31.1             | 727.4       | 1              | y7           |
| TNC                      | ITAQQQYELR          | 589.8                                                        | 2                | 30.1             | 765.4       | 1              | y6           | 594.8                                                               | 2                | 30.1             | 775.4       | 1              | y6           |
| VASN                     | YLQGSVQLR           | 575.8                                                        | 2                | 29.6             | 746.4       | 1              | y7           | 580.8                                                               | 2                | 29.6             | 756.4       | 1              | y7           |
| VCAM1                    | SIDGAYTIR           | 498.3                                                        | 2                | 26.8             | 795.4       | 1              | y7           | 503.3                                                               | 2                | 26.8             | 805.4       | 1              | y7           |
| VWF                      | TNTGLALR            | 423.2                                                        | 2                | 24.1             | 630.4       | 1              | y6           | 428.2                                                               | 2                | 24.1             | 640.4       | 1              | y6           |
| Protocol 2 (30 proteins) |                     |                                                              |                  |                  |             |                |              |                                                                     |                  |                  |             |                |              |
| Protein Name             | Peptide Sequence    | Light ( <sup>12</sup> C/ <sup>14</sup> N-K or R; Endogenous) |                  |                  |             |                |              | Heavy ( <sup>13</sup> C/ <sup>15</sup> N-K or R; Internal Standard) |                  |                  |             |                |              |
|                          |                     | Precursor m/z                                                | Precursor Charge | Collision Energy | Product m/z | Product Charge | Fragment Ion | Precursor m/z                                                       | Precursor Charge | Collision Energy | Product m/z | Product Charge | Fragment Ion |
| ANPEP*                   | ALEQALEK            | 451.3                                                        | 2                | 25.1             | 717.4       | 1              | y6           | 455.3                                                               | 2                | 25.1             | 725.4       | 1              | y6           |
| ANXA1                    | ALTGHLEEVVLLALK     | 536.0                                                        | 3                | 26.7             | 711.4       | 2              | y13          | 538.7                                                               | 3                | 26.7             | 715.4       | 2              | y13          |
| AOC3*                    | NLVTMTTAPR          | 552.3                                                        | 2                | 28.7             | 876.5       | 1              | y8           | 557.3                                                               | 2                | 28.7             | 886.5       | 1              | y8           |
| CAT                      | AFYVNVLNEEQR        | 741.4                                                        | 2                | 35.5             | 788.4       | 1              | y6           | 746.4                                                               | 2                | 35.5             | 798.4       | 1              | y6           |
| CD248*                   | LLWIGLQR            | 499.8                                                        | 2                | 26.9             | 772.4       | 1              | y6           | 504.8                                                               | 2                | 26.9             | 782.5       | 1              | y6           |
| CDH13*                   | INENTGSVSVTR        | 638.8                                                        | 2                | 31.9             | 705.4       | 1              | y7           | 643.8                                                               | 2                | 31.9             | 715.4       | 1              | y7           |
| ELANE                    | QVFAVQR             | 424.2                                                        | 2                | 24.1             | 620.4       | 1              | y5           | 429.2                                                               | 2                | 24.1             | 630.4       | 1              | y5           |
| FLT4                     | HATLSLSIPR          | 547.8                                                        | 2                | 28.6             | 886.5       | 1              | y8           | 552.8                                                               | 2                | 28.6             | 896.5       | 1              | y8           |
| GPIBA*                   | LTSPLGLALR          | 520.8                                                        | 2                | 27.6             | 626.4       | 1              | y6           | 525.8                                                               | 2                | 27.6             | 636.4       | 1              | y6           |
| GSN*                     | AGALNSNDAFVLK       | 660.4                                                        | 2                | 32.6             | 893.5       | 1              | y8           | 664.4                                                               | 2                | 32.6             | 901.5       | 1              | y8           |
| HIST1H4A                 | DAVYTEHAK           | 567.8                                                        | 2                | 29.3             | 849.4       | 1              | y7           | 571.8                                                               | 2                | 29.3             | 857.4       | 1              | y7           |
| ICAM2                    | ILLDEQAQWK          | 622.3                                                        | 2                | 31.3             | 904.4       | 1              | y7           | 626.3                                                               | 2                | 31.3             | 912.4       | 1              | y7           |
| ICAM3                    | TFVLPVTPPR          | 563.8                                                        | 2                | 29.2             | 878.5       | 1              | y8           | 568.8                                                               | 2                | 29.2             | 888.6       | 1              | y8           |
| JUP*                     | LLNDEDPVVTK         | 671.4                                                        | 2                | 33               | 446.3       | 1              | y4           | 675.4                                                               | 2                | 33               | 454.3       | 1              | y4           |
| LAMB2                    | LQEGQTEFLVASPK      | 880.0                                                        | 2                | 40.5             | 600.4       | 1              | y6           | 884.0                                                               | 2                | 40.5             | 608.4       | 1              | y6           |
| LCPI*                    | TENLNDDK            | 539.2                                                        | 2                | 28.3             | 847.4       | 1              | y7           | 543.2                                                               | 2                | 28.3             | 855.4       | 1              | y7           |
| LPL                      | ITGLDPAGPNFEYAEAPSR | 669.0                                                        | 3                | 34               | 559.3       | 1              | y5           | 672.3                                                               | 3                | 34               | 569.3       | 1              | y5           |
| LSP1                     | WETGEVQAQSAK        | 468.9                                                        | 3                | 23.1             | 575.3       | 1              | y6           | 471.6                                                               | 3                | 23.1             | 583.3       | 1              | y6           |
| MMP3                     | GEDTSMNVLQK         | 611.3                                                        | 2                | 30.9             | 819.4       | 1              | y7           | 615.3                                                               | 2                | 30.9             | 827.5       | 1              | y7           |
| MMP9*                    | SLGPALLLLQK         | 576.9                                                        | 2                | 29.6             | 952.6       | 1              | y9           | 580.9                                                               | 2                | 29.6             | 960.6       | 1              | y9           |
| MMRN1                    | HSWTIPEDGNSQK       | 500.2                                                        | 3                | 24.8             | 437.7       | 2              | y8           | 502.9                                                               | 3                | 24.8             | 441.7       | 2              | y8           |
| PODXL*                   | LASVPGSQTVVVK       | 642.9                                                        | 2                | 32               | 914.5       | 1              | y9           | 646.9                                                               | 2                | 32               | 922.5       | 1              | y9           |
| PROCR*                   | TLAFPLTIR           | 516.3                                                        | 2                | 27.4             | 817.5       | 1              | y7           | 521.3                                                               | 2                | 27.4             | 827.5       | 1              | y7           |
| SI00A9*                  | LGHPDILNQGEFK       | 485.9                                                        | 3                | 24               | 722.3       | 1              | y6           | 488.6                                                               | 3                | 24               | 730.4       | 1              | y6           |
| SELL*                    | SLTEEAENWGDEPNK     | 945.4                                                        | 2                | 42.9             | 472.3       | 1              | y4           | 949.4                                                               | 2                | 42.9             | 480.3       | 1              | y4           |
| SELP                     | ALTNEAENWADNEPNK    | 965.4                                                        | 2                | 43.6             | 472.3       | 1              | y4           | 969.4                                                               | 2                | 43.6             | 480.3       | 1              | y4           |
| SOD3                     | AVVVHAGEDDLGR       | 669.3                                                        | 2                | 33               | 832.4       | 1              | y8           | 674.3                                                               | 2                | 33               | 842.4       | 1              | y8           |
| SULF2                    | VYHVGLGDAAQPR       | 691.9                                                        | 2                | 33.8             | 884.5       | 1              | y9           | 696.9                                                               | 2                | 33.8             | 894.5       | 1              | y9           |
| TFPI*                    | FFNIFTR             | 546.3                                                        | 2                | 28.5             | 797.4       | 1              | y6           | 551.3                                                               | 2                | 28.5             | 807.4       | 1              | y6           |
| TKT*                     | AVELAANTK           | 458.8                                                        | 2                | 25.4             | 746.4       | 1              | y7           | 462.8                                                               | 2                | 25.4             | 754.4       | 1              | y7           |

\* Proteins quantified in paired serum samples from ≥20 patients

Table S5 The 20 proteins with a significant change before and at 6 months after treatment in protocol 1 (n = 23) and protocol 2 (n = 29) in the SRM assay

| Marker                  | Highly active (L/H ratio) | Remission (L/H ratio) | <i>P</i> value       |
|-------------------------|---------------------------|-----------------------|----------------------|
| Protocol 1              |                           |                       |                      |
| Down-regulated proteins |                           |                       |                      |
| CD93                    | 0.015 (0.013-0.017)       | 0.01 (0.008-0.011)    | <0.0001*             |
| CRP                     | 6.8 (0.9-10.6)            | 0.15 (0.03-0.29)      | <0.0001*             |
| LRG1                    | 3.1 (1.7-3.9)             | 1.3 (0.9-1.7)         | <0.0001*             |
| S100A8                  | 0.28 (0.12-0.44)          | 0.1 (0.08-0.14)       | 0.0003*              |
| TIMP1                   | 0.032 (0.025-0.045)       | 0.018 (0.013-0.026)   | <0.0001*             |
| TNC                     | 0.037 (0.028-0.045)       | 0.018 (0.014-0.024)   | <0.0001*             |
| Up-regulated proteins   |                           |                       |                      |
| HGFAC                   | 0.12 (0.1-0.15)           | 0.18 (0.14-0.25)      | 0.0006*              |
| MCAM                    | 0.011 (0.009-0.016)       | 0.022 (0.02-0.027)    | <0.0001*             |
| PROC                    | 0.09 (0.07-0.12)          | 0.15 (0.11-0.19)      | <0.0001*             |
| SEPP1                   | 0.14 (0.12-0.21)          | 0.21 (0.15-0.32)      | 0.0008*              |
| SERPINA4                | 0.19 (0.1-0.24)           | 0.36 (0.25-0.44)      | <0.0001*             |
| Protocol 2              |                           |                       |                      |
| Down-regulated proteins |                           |                       |                      |
| MMP9                    | 0.026 (0.013-0.044)       | 0.011 (0.007-0.02)    | 0.001 <sup>†</sup>   |
| S100A9                  | 0.15 (0.1-0.26)           | 0.07 (0.04-0.1)       | <0.0001 <sup>†</sup> |
| TKT                     | 0.22 (0.15-0.35)          | 0.12 (0.1-0.2)        | <0.0001 <sup>†</sup> |
| Up-regulated proteins   |                           |                       |                      |
| ANPEP                   | 0.71 (0.56-0.86)          | 1.09 (0.68-1.31)      | 0.0011 <sup>†</sup>  |
| CDH13                   | 0.032 (0.024-0.038)       | 0.049 (0.037-0.053)   | 0.0002 <sup>†</sup>  |
| GSN                     | 0.67 (0.41-1.04)          | 1.53 (0.97-1.87)      | <0.0001 <sup>†</sup> |
| JUP                     | 0.92 (0.61-1.28)          | 1.67 (1.07-2.08)      | 0.0002 <sup>†</sup>  |
| PODXL                   | 0.006 (0.004-0.006)       | 0.007 (0.006-0.01)    | <0.0001 <sup>†</sup> |
| TFPI                    | 0.018 (0.014-0.027)       | 0.029 (0.02-0.036)    | 0.0074 <sup>†</sup>  |

Values are median (IQR). *P* values were determined by Wilcoxon signed-rank test. Statistically significance was determined by \**P*<0.05/44 (protocol 1) or <sup>†</sup>*P*<0.05/15 (protocol 2) by Bonferroni correction.

L/H ratio; light to heavy ratio, HGFAC, hepatocyte growth factor activator; MCAM, melanoma cell adhesion molecule; PROC, protein C; SEPP1, selenoprotein P; SERPINA4, serpin family A member 4; ANPEP, aminopeptidase N; CDH13, cadherin 13; GSN, gelsolin; JUP, junction plakoglobin; PODXL, podocalyxin like; TFPI, tissue factor pathway inhibitor.

Table S6 Comparison of serum levels of biomarker candidates between the remission group (n = 62) and the non-remission group (n = 17) at 6 months after treatment

| Marker                       | Remission           | Non-remission       | <i>P</i> value |
|------------------------------|---------------------|---------------------|----------------|
| CRP (mg/dL)                  | 0.058 (0.011-0.163) | 0.027 (0.013-0.111) | 0.99           |
| TIMP1 (ng/mL)                | 156 (134-175)       | 180 (147-196)       | 0.02*          |
| LRG1 (µg/mL)                 | 40.1 (29.8-62.0)    | 38.5 (27.4-56.1)    | 0.70           |
| TNC (ng/mL)                  | 47.0 (37.0-68.3)    | 58.1 (25.1-93.1)    | 0.58           |
| S100A8/A9 (µg/mL)            | 2.2 (1.2-3.8)       | 2.9 (1.9-3.6)       | 0.23           |
| CD93 (ng/mL)                 | 124 (103-164)       | 169 (108-243)       | 0.09           |
| TKT (ng/mL)                  | 52.0 (28.9-91.5)    | 89.3 (58.9-137)     | 0.01*          |
| MMP9 (ng/mL)                 | 566 (330-839)       | 720 (574-963)       | 0.09           |
| MPO-ANCA (U/mL) <sup>‡</sup> | 0.8 (0.48-2.2)      | 1.5 (0.38-3.3)      | 0.52           |

Values are median (IQR).

\* $P < 0.05$  by analysis of covariance adjusted for age, sex, and four distinct AAV groups (MPA, GPA, EGPA, and unclassifiable disease).

<sup>‡</sup>Only MPO-ANCA positive patients; n = 60 (remission group, n = 48; non-remission group, n = 12)

Table S7 Marker levels in old healthy donors

|               | Old healthy donors (n=16) | Healthy donors (n=30) | <i>P</i> value |
|---------------|---------------------------|-----------------------|----------------|
| Age, years    | 72 (67-79)                | 29 (25-38)            |                |
| TIMP1 (ng/mL) | 147 (129-159)             | 132 (115-148)         | 0.1            |
| CD93 (ng/mL)  | 142 (110-158)             | 125 (103-139)         | 0.17           |
| TKT (ng/mL)   | 23.8 (13.8-39.9)          | 33.1 (15.1-42.6)      | 0.51           |

Values are median (IQR).

*P* values are determined by Mann-Whitney U test.

Old healthy donors: Sex (male, n=12; female, n=4); median eGFR 67 (IQR: 60-71) mL/min/1.73m<sup>2</sup>.

Table S8 Comparison of serum levels of biomarker candidates between the AAV patients with (n = 120) and without renal involvement (n = 49) before treatment

| Marker                       | Renal involvement |                 | P value |
|------------------------------|-------------------|-----------------|---------|
|                              | +                 | -               |         |
| CRP (mg/dL)                  | 3.7 (0.9-7.8)     | 4.3 (1.1-9.3)   | 0.24    |
| TIMP1 (ng/mL)                | 344 (246-437)     | 316 (174-403)   | 0.61    |
| LRG1 (µg/mL)                 | 86.3 (53.0-132)   | 84.5 (59.6-145) | 0.92    |
| TNC (ng/mL)                  | 145 (81.6-277)    | 145 (95.2-234)  | 0.90    |
| S100A8/A9 (µg/mL)            | 5.7 (3.6-8.9)     | 6.3 (3.0-8.6)   | 0.88    |
| CD93 (ng/mL)                 | 255 (199-340)     | 163 (126-193)   | 0.0001* |
| TKT (ng/mL)                  | 147 (81.6-277)    | 88.2 (52.0-131) | 0.0006* |
| MMP9 (ng/mL)                 | 758 (427-1324)    | 907 (445-1557)  | 0.40    |
| MPO-ANCA (U/mL) <sup>‡</sup> | 71.7 (30.2-335)   | 80.1 (43.5-188) | 0.74    |

Values are median (IQR).

\* $P < 0.05$  by analysis of covariance adjusted for age, sex, and four distinct AAV groups (MPA, GPA, EGPA, and unclassifiable disease).

<sup>‡</sup>Only MPO-ANCA positive patients; n = 137 (with renal involvement, n = 106; without renal involvement, n = 31).

Table S9 Comparison of serum levels of biomarker candidates between the AAV patients with and without lung involvement before treatment

| Marker                       | No lung involvement | Lung infiltration |                             | Nodules or cavities |                             |
|------------------------------|---------------------|-------------------|-----------------------------|---------------------|-----------------------------|
|                              | n = 95              | n = 25            | <i>P</i> value <sup>†</sup> | n = 11              | <i>P</i> value <sup>§</sup> |
| CRP (mg/dL)                  | 3.2 (0.3-7.7)       | 4.3 (1.2-9.1)     | 0.19                        | 6.9 (4.5-8.1)       | 0.93                        |
| TIMP1 (ng/mL)                | 308 (213-396)       | 372 (267-457)     | 0.06                        | 360 (341-416)       | 0.09                        |
| LRG1 (µg/mL)                 | 86.1 (52.1-134)     | 88.0 (50.2-129)   | 0.76                        | 153 (88.5-208)      | 0.98                        |
| TNC (ng/mL)                  | 132 (75.3-186)      | 197 (111-301)     | 0.03 <sup>*</sup>           | 305 (157-346)       | 0.22                        |
| S100A8/A9 (µg/mL)            | 5.3 (3.2-8.6)       | 6.3 (3.2-8.6)     | 0.40                        | 7.8 (5.4-9.4)       | 0.29                        |
| CD93 (ng/mL)                 | 212 (164-297)       | 231 (169-352)     | 0.26                        | 205 (152-236)       | 0.25                        |
| TKT (ng/mL)                  | 115 (62.5-172)      | 137 (78.7-203)    | 0.16                        | 76.6 (63.5-111)     | 0.58                        |
| MMP9 (ng/mL)                 | 780 (429-1388)      | 746 (362-1099)    | 0.42                        | 1554 (668-1916)     | 0.39                        |
| MPO-ANCA (U/mL) <sup>‡</sup> | 63.2 (26.5-202)     | 80.7 (46.8-294)   | 0.41                        | 139 (97.7-437)      | 0.31                        |

Values are median (IQR).

<sup>\*</sup>*P*<0.05 by analysis of covariance adjusted for age, sex, and four distinct AAV groups (MPA, GPA, EGPA, and unclassifiable disease). <sup>†</sup>No lung involvement vs lung infiltration. <sup>§</sup>No lung involvement vs nodules or cavities.

<sup>‡</sup>Only MPO-ANCA positive patients: no lung involvement, n = 77, lung infiltration, n = 23; nodules or cavities, n = 6.

Table S10 Comparison of marker levels among MPA, GPA, and EGPA before treatment

| Marker            | MPA (n = 105)    | GPA (n = 36)     | EGPA (n = 25)    |
|-------------------|------------------|------------------|------------------|
| CRP (mg/dL)       | 3.63 (0.62-8.93) | 5.45 (1.98-8.34) | 2.13 (0.41-6.32) |
| TIMP1 (ng/mL)     | 350 (227-465)    | 314 (253-365)    | 299 (153-395)    |
| LRG1 (µg/mL)*     | 83.2 (48.2-120)  | 103 (71.4-186)   | 79.9 (53.3-127)  |
| TNC (ng/mL)*      | 142 (75.1-242)   | 209 (126-335)    | 131 (87.3-197)   |
| S100A8/A9 (µg/mL) | 5.6 (3.6-8.6)    | 6.8 (3.5-10.6)   | 5.5 (2.8-8.5)    |
| MMP9 (ng/mL)*     | 728 (394-1191)   | 1142 (675-1909)  | 746 (428-1557)   |
| CD93 (ng/mL)*, †  | 263 (203-352)    | 187 (126-231)    | 160 (130-193)    |
| TKT (ng/mL)*, §   | 143 (85-191)     | 83 (57.3-136)    | 115 (68.9-149)   |

Values are median (IQR).

*P* values were determined by analysis of covariance adjusted for age, sex. Statistically significance was determined by <0.05/3 by Bonferroni correction: \*MPA vs GPA. †MPA vs EGPA. §GPA vs EGPA.



Table S11 Association of marker levels with disease severity in AAV before treatment

| Marker            | EUVAS                 |                  |                | RPGN              |                    |                | FFS               |                 |                |
|-------------------|-----------------------|------------------|----------------|-------------------|--------------------|----------------|-------------------|-----------------|----------------|
|                   | L/ ES / Ge<br>n = 138 | Severe<br>n = 31 | <i>P</i> value | I + II<br>n = 126 | III + IV<br>n = 43 | <i>P</i> value | ≤1 + 2<br>n = 124 | 3≤<br>n = 45    | <i>P</i> value |
| CRP (mg/dL)       | 4.0 (0.6-8.8)         | 3.6 (2.1-6.6)    | 0.09           | 2.9 (0.4-7.2)     | 6.7 (3.5-13.8)     | 0.002*         | 4.6 (1.2-9.2)     | 2.4 (0.3-5.6)   | 0.005*         |
| TIMP1 (ng/mL)     | 333 (225-424)         | 350 (244-448)    | 0.43           | 305 (212-398)     | 405 (331-515)      | 0.001*         | 343 (224-425)     | 312 (227-434)   | 0.05           |
| LRG1 (µg/mL)      | 86.6 (53.8-141)       | 75.3 (54.1-109)  | 0.45           | 83.7 (50.6-133)   | 96.7 (70.9-136)    | 0.14           | 90.0 (60.7-146)   | 70.1 (46.7-108) | 0.17           |
| TNC (ng/mL)       | 144 (83.0-248)        | 152 (90.6-368)   | 0.20           | 129 (75.2-184)    | 301 (193-430)      | <0.0001*       | 145 (86.3-237)    | 157 (75.9-332)  | 0.41           |
| S100A8/A9 (µg/mL) | 5.8 (3.3-8.9)         | 5.6 (4.3-8.7)    | 0.32           | 5.4 (3.1-8.3)     | 8.0 (5.3-12.0)     | 0.003*         | 6.0 (3.6-8.9)     | 5.3 (3.2-8.1)   | 0.20           |
| CD93 (ng/mL)      | 211 (162-281)         | 292 (209-390)    | 0.006*         | 200 (150-270)     | 293 (233-388)      | 0.0001*        | 197 (151-252)     | 337 (279-405)   | <0.0001*       |
| TKT (ng/mL)       | 110 (63.5-161)        | 184 (144-296)    | 0.0002*        | 109 (62.0-155)    | 183 (120-276)      | 0.0005*        | 95.5 (61.6-153)   | 184 (140-294)   | <0.0001*       |
| MMP9 (ng/mL)      | 847 (441-1474)        | 625 (285-1107)   | 0.02*          | 758 (434-1371)    | 884 (367-1598)     | 0.92           | 909 (453-1557)    | 534 (285-908)   | 0.002*         |
| MPO-ANCA (U/mL)** | 73.7 (31.7-212)       | 88.6 (38.9-327)  | 0.26           | 80.4 (32.4-211)   | 69.8 (40.9-311)    | 0.76           | 80.4 (34.2-252)   | 67.2 (31.4-277) | 0.83           |

Values are median (IQR).

\* $P < 0.05$  by analysis of covariance adjusted for age, sex, and four distinct AAV groups (MPA, GPA, EGPA, and unclassifiable disease).

EUVAS, European Vasculitis Study Group, L/ES/Ge, Localized/Early systemic/Generalized; RPGN, rapidly progressive glomerulonephritis; FFS, Five-Factor Score.

\*\*Only MPO-ANCA positive patients: EUVAS (L/ES/Ge, n = 110; Severe, n = 27); RPGN (I + II, n = 96; III + IV, n = 41); FFS (≤1 + 2, n = 94; 3≤, n = 43)
